# Supplementary material for: Association of Electrical Cardioversion with Brain Perfusion and Cognitive Function in Patients with Atrial Fibrillation
Source: MDPI journal article supplement (doi:10.3390/life13040935), 2023-04-03

**Supplementary Table S1.** Characteristics of atrial fibrillation group.

|                                              | AF Patients (N = 25) |
|----------------------------------------------|----------------------|
| Duration of AF (days)                        | 72 ± 37              |
| EHRA class                                   |                      |
| 1                                            | 5 (20 %)             |
| 2a                                           | 11 (44 %)            |
| 2b                                           | 8 (32 %)             |
| 3                                            | 1 (4 %)              |
| 4                                            | 0 (0 %)              |
| 24h Holter monitor                           |                      |
| Average HR (bpm)                             | 89 ± 16              |
| Time in tachycardia > 110/min (minutes)      | 299 ± 309            |
| Time in tachycardia > 110/min (% of time)    | 22 ± 23              |
| Echo parameters                              |                      |
| LA size (mm)                                 | 47 ± 5               |
| LV EF (%)                                    | 57 ± 10              |
| CHA <sub>2</sub> DS <sub>2</sub> -VASc score | 2.3 ± 1.1            |
| HAS BLEED score                              | 0.7 ± 0.6            |
| Anticoagulation drug                         |                      |
| warfarin                                     | 3 (12 %)             |
| apixaban                                     | 13 (52 %)            |
| dabigatran                                   | 5 (20 %)             |
| edoxaban                                     | 3 (12 %)             |
| rivaroxaban                                  | 1 (4 %)              |
| Antiarrhythmic therapy                       |                      |
| amiodarone                                   | 8 (32 %)             |
| propafenone                                  | 1 (4 %)              |
| Previous ECV                                 | 7 (28 %)             |
| Previous PVI                                 | 1 (4 %)              |

Descriptive characteristics of patients with atrial fibrillation before electrical cardioversion. Duration of AF represents time elapsed since documented onset of atrial fibrillation until the day electrical cardioversion has been performed. EHRA class is designated according to recent guidelines (12). CHA<sub>2</sub>DS<sub>2</sub>-VASc score and HAS BLEED score are calculated as previously described (12). Values are expressed as averages ± standard deviation or absolute number and percentage of total (in parenthesis). Abbreviations: AF – atrial fibrillation; ECV – electrical cardioversion; LA – left atrium; LV EF – left ventricular ejection fraction; PVI – pulmonary vein isolation.

**Supplementary Table S2.** Comparison of cognitive function score based on electrical cardioversion.

| Variables                                                          | Before   | After    | <i>p</i> -Value * |
|--------------------------------------------------------------------|----------|----------|-------------------|
| PROMIS index                                                       | 52.6±9.6 | 52.7±9.6 | 0.952             |
| PROMIS dimension 1: Slower thinking                                | 4.3±0.9  | 4.2±0.8  | 0.390             |
| PROMIS dimension 2: Impression of brain thinking impairment        | 4.2±0.9  | 4.3±0.8  | 0.905             |
| PROMIS dimension 3: Need for stronger focus on everyday activities | 4.3±0.9  | 4.4±0.7  | 0.214             |
| PROMIS dimension 4: Impairment in multi-tasking                    | 4.3±1.0  | 4.4±0.8  | 0.439             |
| PROMIS dimension 5: Concentration impairment                       | 4.0±1.1  | 4.0±1.1  | 1.000             |
| PROMIS dimension 6: Need for stronger focus to avoid mistakes      | 4.2±1.0  | 4.2±1.2  | 0.335             |
| PROMIS dimension 7: Impairment in idea shaping                     | 4.1±1.2  | 4.1±1.0  | 0.689             |
| PROMIS dimension 8: Impairment in number calculation               | 4.5±0.9  | 4.5±1.0  | 0.934             |

Data are expressed as mean ± standard deviation.

\* t-test.

**Supplementary Figure S1.** Flow diagram.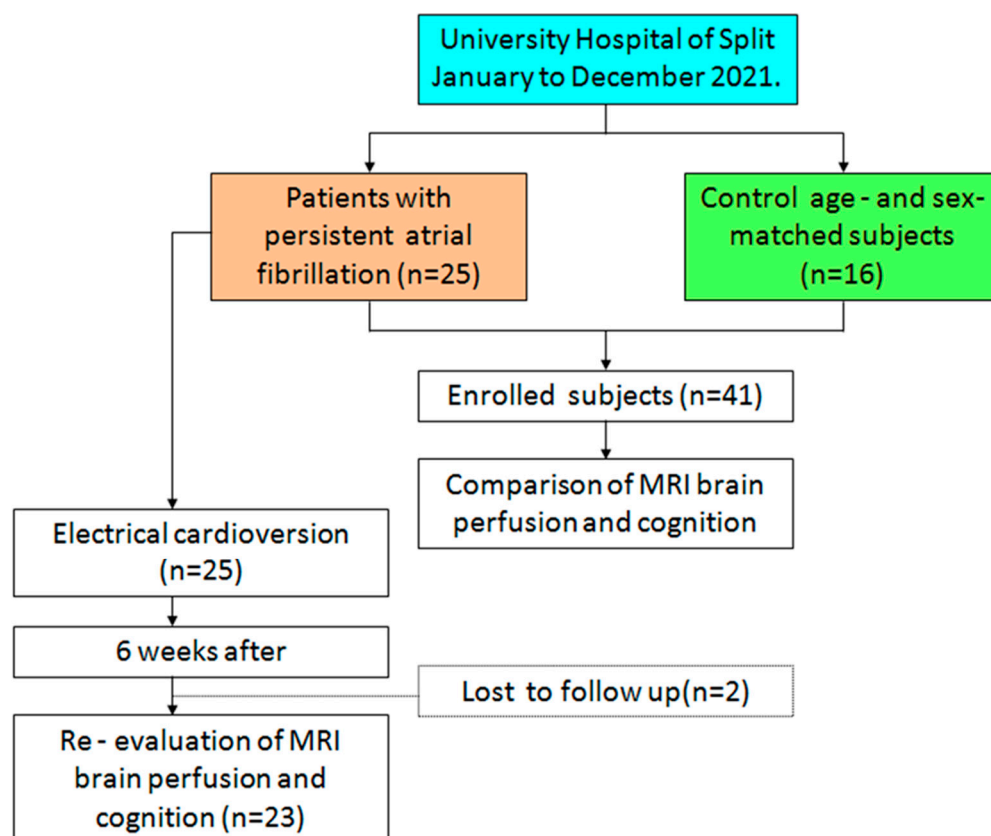

Supplement: s1 [file s1]
